# Supplementary material for: Clinical Determinants and Prognosis of Left Ventricular Reverse Remodelling in Non-Ischemic Dilated Cardiomyopathy
Source: MDPI journal article supplement (doi:10.3390/jcdd9010020), 2022-01-11
Supplement: s1 [file s1]

Table S6. Analysis of potential predictors of LVRR in patients with the follow-up echocardiogram performed 1 year after the initial echocardiogram (N=347).

| Variable                | Multivariate analysis,<br>NTproBNP included |           |         | Multivariate analysis,<br>NTproBNP not included |           |         |
|-------------------------|---------------------------------------------|-----------|---------|-------------------------------------------------|-----------|---------|
|                         | OR                                          | 95% CI    | P value | OR                                              | 95% CI    | P value |
| Hypertension            |                                             |           |         | 1.55                                            | 0.95-2.54 | 0.077   |
| eGFR (ml/min)           | 0.98                                        | 0.97-0.99 | 0.012   |                                                 |           |         |
| logNT-proBNP (ng/L)     | 0.62                                        | 0.47-0.81 | <0.001  |                                                 |           |         |
| logHF duration (months) | 0.83                                        | 0.69-0.98 | 0.031   | 0.81                                            | 0.71-0.93 | 0.002   |
| Initial iLVEDD (mm)     |                                             |           |         | 0.95                                            | 0.90-0.99 | 0.032   |
| Initial LVEF (%)        | 0.93                                        | 0.89-0.97 | 0.001   | 0.93                                            | 0.89-0.96 | <0.001  |
| Absence of LBBB         | 2.96                                        | 1.37-6.37 | 0.006   | 3.04                                            | 1.57-5.87 | 0.001   |

Data presented as odds ratios and 95% confidence intervals from the logistic regression models. Abbreviations: eGFR = estimated glomerular filtration rate; HF = heart failure; iLVEDD = indexed left ventricular end-diastolic diameter; LBBB = left bundle branch block; LVEF = left ventricle ejection fraction; LVRR = left ventricular reverse remodeling; NTproBNP = N-terminal prohormone of brain natriuretic peptide.
