# Supplementary material for: Clinical Determinants and Prognosis of Left Ventricular Reverse Remodelling in Non-Ischemic Dilated Cardiomyopathy
Source: MDPI journal article supplement (doi:10.3390/jcdd9010020), 2022-01-11
Supplement: s1 [file s1]

Table S1. Analysis of potential predictors of LVRR in patients with LVEF < 35% (N=433).

| Variable                | Multivariate analysis,<br>NTproBNP included |            |         | Multivariate analysis,<br>NTproBNP not included |           |         |
|-------------------------|---------------------------------------------|------------|---------|-------------------------------------------------|-----------|---------|
|                         | OR                                          | 95% CI     | P value | OR                                              | 95% CI    | P value |
| Age                     | 0.97                                        | 0.95-1.00  | 0.060   | 0.98                                            | 0.97-1.00 | 0.101   |
| Hypertension            |                                             |            |         | 0.65                                            | 0.42-1.01 | 0.054   |
| eGFR (ml/min)           | 0.98                                        | 0.97-0.99  | 0.012   |                                                 |           |         |
| logNT-proBNP (ng/L)     | 0.65                                        | 0.51-0.82. | <0.001  |                                                 |           |         |
| logHF duration (months) | 0.81                                        | 0.69-0.94  | 0.006   | 0.77                                            | 0.68-0.87 | <0.001  |
| Initial iLVEDD (mm)     | 0.94                                        | 0.89-0.99  | 0.040   | 0.95                                            | 0.91-0.99 | 0.032   |
| Initial LVEF (%)        | 0.91                                        | 0.86-0.96. | 0.001   | 0.93                                            | 0.89-0.97 | <0.001  |
| QRS complex (ms)        |                                             |            |         | 0.99                                            | 0.98-0.99 | 0.005   |
| Absence of LBBB         | 2.37                                        | 1.27-4.44  | 0.007   |                                                 |           |         |

Data presented as odds ratios and 95% confidence intervals from the logistic regression models. Abbreviations: eGFR = estimated glomerular filtration rate; HF = heart failure; iLVEDD = indexed left ventricular end-diastolic diameter; LBBB = left bundle branch block; LVEF = left ventricle ejection fraction; LVRR = left ventricular reverse remodeling; NTproBNP = N-terminal prohormone of brain natriuretic peptide.
