# Supplementary material for: Clinical Determinants and Prognosis of Left Ventricular Reverse Remodelling in Non-Ischemic Dilated Cardiomyopathy
Source: MDPI journal article supplement (doi:10.3390/jcdd9010020), 2022-01-11
Supplement: s1 [file s1]

Table S3. Analysis of potential predictors of LVRR in patients with a history of HF duration of  $\leq 3$  months (N=190).

| Variable            | Multivariate analysis,<br>NTproBNP included |           |         | Multivariate analysis,<br>NTproBNP not included |           |         |
|---------------------|---------------------------------------------|-----------|---------|-------------------------------------------------|-----------|---------|
|                     | OR                                          | 95% CI    | P value | OR                                              | 95% CI    | P value |
| Age                 |                                             |           |         | 0.97                                            | 0.94-0.99 | 0.008   |
| Hypertension        |                                             |           |         | 1.82                                            | 0.93-3.59 | 0.082   |
| logNT-proBNP (ng/L) | 0.77                                        | 0.58-1.02 | 0.071   |                                                 |           |         |
| Initial LVEF (%)    | 0.91                                        | 0.84-0.98 | 0.019   | 0.95                                            | 0.90-1.00 | 0.072   |
| QRS complex (ms)    | 0.98                                        | 0.96-0.99 | <0.001  | 0.98                                            | 0.97-0.99 | 0.002   |

Data presented as odds ratios and 95% confidence intervals from the logistic regression models. Abbreviations: LVEF = left ventricle ejection fraction; LVRR = left ventricular reverse remodeling; NTproBNP = N-terminal prohormone of brain natriuretic peptide.
