# Supplementary material for: Clinical Determinants and Prognosis of Left Ventricular Reverse Remodelling in Non-Ischemic Dilated Cardiomyopathy
Source: MDPI journal article supplement (doi:10.3390/jcdd9010020), 2022-01-11
Supplement: s1 [file s1]

Table S5. Analysis of potential predictors of LVRR in patients with the follow-up echocardiogram performed 1 year or less after the initial echocardiogram (N=180).

| Variable                | Multivariate analysis,<br>NTproBNP included |            |         | Multivariate analysis,<br>NTproBNP not included |           |         |
|-------------------------|---------------------------------------------|------------|---------|-------------------------------------------------|-----------|---------|
|                         | OR                                          | 95% CI     | P value | OR                                              | 95% CI    | P value |
| Age                     |                                             |            |         | 0.96                                            | 0.93-0.99 | 0.019   |
| Hypertension            |                                             |            |         | 2.23                                            | 1.05-4.77 | 0.037   |
| logNT-proBNP (ng/L)     | 0.72                                        | 0.49-1.06  | 0.100   |                                                 |           |         |
| logHF duration (months) | 0.58                                        | 0.44-0.76  | <0.001  | 0.61                                            | 0.58-0.76 | <0.001  |
| Initial LVEF (%)        | 0.84                                        | 0.77-0.92  | <0.001  | 0.89                                            | 0.84-0.95 | <0.001  |
| QRS complex (ms)        |                                             |            |         | 0.98                                            | 0.97-0.99 | 0.043   |
| Absence of LBBB         | 4.38                                        | 1.53-12.52 | 0.006   |                                                 |           |         |

Data presented as odds ratios and 95% confidence intervals from the logistic regression models. Abbreviations: HF = heart failure; iLVEDD = indexed left ventricular end-diastolic diameter; LBBB = left bundle branch block; LVEF = left ventricle ejection fraction; LVRR = left ventricular reverse remodeling; NTproBNP = N-terminal prohormone of brain natriuretic peptide.
