# Supplementary material for: Clinical Determinants and Prognosis of Left Ventricular Reverse Remodelling in Non-Ischemic Dilated Cardiomyopathy
Source: MDPI journal article supplement (doi:10.3390/jcdd9010020), 2022-01-11
Supplement: s1 [file s1]

Table S4. Analysis of potential predictors of LVRR in patients with a history of HF duration of > 3 months (N=337).

| Variable                | Multivariate analysis,<br>NTproBNP included |           |         | Multivariate analysis,<br>NTproBNP not included |           |         |
|-------------------------|---------------------------------------------|-----------|---------|-------------------------------------------------|-----------|---------|
|                         | OR                                          | 95% CI    | P value | OR                                              | 95% CI    | P value |
| Hypertension            |                                             |           |         | 1.83                                            | 1.1-3.06  | 0.020   |
| eGFR (ml/min)           | 0.98                                        | 0.97-0.99 | 0.015   |                                                 |           |         |
| logNT-proBNP (ng/L)     | 0.61                                        | 0.46-0.82 | 0.001   |                                                 |           |         |
| logHF duration (months) | 0.69                                        | 0.54-0.88 | 0.003   | 0.68                                            | 0.55-0.83 | <0.001  |
| Initial LVEF (%)        | 0.91                                        | 0.87-0.95 | <0.001  | 0.92                                            | 0.89-0.96 | <0.001  |
| Absence of LBBB         | 2.68                                        | 1.31-5.49 | 0.007   | 2.22                                            | 1.22-4.03 | 0.009   |

Data presented as odds ratios and 95% confidence intervals from the logistic regression models. Abbreviations: eGFR = estimated glomerular filtration rate; HF = heart failure; LBBB = left bundle branch block; LVEF = left ventricle ejection fraction; LVRR = left ventricular reverse remodeling; NTproBNP = N-terminal prohormone of brain natriuretic peptide.
