# Supplementary material for: Clinical Determinants and Prognosis of Left Ventricular Reverse Remodelling in Non-Ischemic Dilated Cardiomyopathy
Source: MDPI journal article supplement (doi:10.3390/jcdd9010020), 2022-01-11
Supplement: s1 [file s1]

Table S2. Analysis of potential predictors of LVRR in patients with LVEF  $\leq$  35% (N=94).

| Variable                | Multivariate analysis,<br>NTproBNP included |           |         | Multivariate analysis,<br>NTproBNP not included |           |         |
|-------------------------|---------------------------------------------|-----------|---------|-------------------------------------------------|-----------|---------|
|                         | OR                                          | 95% CI    | P value | OR                                              | 95% CI    | P value |
| Age                     |                                             |           |         | 0.96                                            | 0.92-1.00 | 0.094   |
| eGFR (ml/min)           | 0.97                                        | 0.95-1.00 | 0.067   |                                                 |           |         |
| logNT-proBNP (ng/L)     | 0.53                                        | 0.27-1.02 | 0.058   |                                                 |           |         |
| logHF duration (months) | 0.58                                        | 0.35-0.96 | 0.034   | 0.62                                            | 0.43-0.88 | 0.009   |
| Initial LVEF (%)        | 0.71                                        | 0.51-0.98 | 0.041   | 0.61                                            | 0.43-0.87 | 0.007   |

Data presented as odds ratios and 95% confidence intervals from the logistic regression models. Abbreviations: eGFR = estimated glomerular filtration rate; HF = heart failure; LVEF = left ventricle ejection fraction; LVRR = left ventricular reverse remodeling; NTproBNP = N-terminal prohormone of brain natriuretic peptide.
